# Supplementary material
Source: PubMed Central journal article supplement (PMC3156157)
Supplement: 1106379108_ST01.pdf [file 1106379108_ST01.pdf]

**Table S1.** Block copolymers used in the HT library nanoparticle formation and in preliminary screening. The block copolymers are ordered by the outer block type, and then by increasing molecular weight. For preliminary studies to examine the effect of block length on nanoparticle formation, a series of block copolymers that systematically varied in weight % of OEO MA and GMA blocks were cross-linked with different amines and characterized.

|    |                                                                                      | $M_n$<br>(g/mol) | PDI  | Weight %<br>shell forming<br>block | Weight %<br>core forming<br>block (GMA) |
|----|--------------------------------------------------------------------------------------|------------------|------|------------------------------------|-----------------------------------------|
| A  | P((OEO <sub>5</sub> MA) <sub>47</sub> -b-GMA <sub>6</sub> )                          | 15,200           | 1.31 | 95                                 | 5                                       |
| B  | P((OEO <sub>5</sub> MA) <sub>56</sub> -b-GMA <sub>8</sub> )                          | 18,300           | 1.37 | 94                                 | 6                                       |
| C  | P((OEO <sub>5</sub> MA) <sub>12</sub> -b-GMA <sub>135</sub> )                        | 23,050           | 1.35 | 16                                 | 84                                      |
| D  | P((OEO <sub>5</sub> MA) <sub>56</sub> -b-GMA <sub>93</sub> )                         | 30,400           | 1.98 | 56                                 | 44                                      |
| E  | P((OEO <sub>5</sub> MA) <sub>50</sub> -b-GMA <sub>178</sub> )                        | 40,530           | 1.49 | 37                                 | 63                                      |
| F  | P((OEO <sub>5</sub> MA) <sub>106</sub> -b-GMA <sub>478</sub> )                       | 100,200          | 2.56 | 32                                 | 68                                      |
| G  | P((OEO <sub>5</sub> MA) <sub>90</sub> -b-(HEMA <sub>23</sub> -r-GMA <sub>17</sub> )) | 34,300           | 1.68 | 83                                 | 17                                      |
| H  | P((OEO <sub>9</sub> MA) <sub>48</sub> -b-GMA <sub>17</sub> )                         | 25,300           | 1.24 | 90                                 | 10                                      |
| I  | P((OEO <sub>23</sub> MA) <sub>9</sub> -b-GMA <sub>3</sub> )                          | 10,040           | 1.20 | 96                                 | 4                                       |
| J  | P((OEO <sub>23</sub> MA) <sub>18</sub> -b-GMA <sub>168</sub> )                       | 34,300           | 1.56 | 45                                 | 55                                      |
| K  | P(CEA <sub>104</sub> -b-GMA <sub>126</sub> )                                         | 34,200           | 1.48 | 46                                 | 54                                      |
| L  | P(MAA <sub>232</sub> -b-GMA <sub>639</sub> )                                         | 110,800          | 1.95 | 18                                 | 82                                      |
| M  | P(DMAEMA <sub>43</sub> -b-GMA <sub>23</sub> )                                        | 13,550           | 1.35 | 67                                 | 33                                      |
| N  | P(Zwit <sub>57</sub> -b-GMA <sub>371</sub> )                                         | 69,400           | 1.6  | 24                                 | 76                                      |
| O  | P(MMA <sub>146</sub> -b-GMA <sub>25</sub> )                                          | 18,200           | 1.12 | 80                                 | 20                                      |
| P  | PGMA <sub>22</sub>                                                                   | 3,120            | 1.27 | 0                                  | 100                                     |
| Q  | P((OEO <sub>5</sub> MA) <sub>25</sub> -b-GMA <sub>3</sub> )                          | 8,810            | 1.37 | 95                                 | 5                                       |
| R  | P((OEO <sub>5</sub> MA) <sub>25</sub> -b-GMA <sub>6</sub> )                          | 9,130            | 1.36 | 90                                 | 10                                      |
| S  | P((OEO <sub>5</sub> MA) <sub>25</sub> -b-GMA <sub>10</sub> )                         | 9,770            | 1.37 | 84                                 | 16                                      |
| T  | P((OEO <sub>5</sub> MA) <sub>25</sub> -b-GMA <sub>18</sub> )                         | 10,840           | 1.33 | 75                                 | 25                                      |
| U  | P((OEO <sub>5</sub> MA) <sub>25</sub> -b-GMA <sub>31</sub> )                         | 12,680           | 1.70 | 63                                 | 37                                      |
| V  | P((OEO <sub>5</sub> MA) <sub>32</sub> -b-GMA <sub>13</sub> )                         | 11,810           | 1.38 | 84                                 | 16                                      |
| W  | P((OEO <sub>5</sub> MA) <sub>32</sub> -b-GMA <sub>161</sub> )                        | 33,120           | 1.35 | 30                                 | 70                                      |
| X  | P((OEO <sub>5</sub> MA) <sub>44</sub> -b-GMA <sub>21</sub> )                         | 17,000           | 1.36 | 82                                 | 18                                      |
| Y  | P((OEO <sub>5</sub> MA) <sub>44</sub> -b-GMA <sub>87</sub> )                         | 26,410           | 1.40 | 52                                 | 48                                      |
| Z  | P((OEO <sub>5</sub> MA) <sub>91</sub> -b-GMA <sub>4</sub> )                          | 28,230           | 1.42 | 98                                 | 2                                       |
| AA | P((OEO <sub>5</sub> MA) <sub>91</sub> -b-GMA <sub>114</sub> )                        | 43,930           | 1.98 | 63                                 | 37                                      |
| BB | P(GMA <sub>39</sub> -b-(OEO <sub>5</sub> MA) <sub>6</sub> )                          | 8,060            | 1.31 | 24                                 | 76                                      |
| CC | P(GMA <sub>39</sub> -b-(OEO <sub>5</sub> MA) <sub>15</sub> )                         | 10,900           | 1.37 | 45                                 | 55                                      |
| DD | P(GMA <sub>39</sub> -b-(OEO <sub>5</sub> MA) <sub>22</sub> )                         | 12,760           | 1.27 | 54                                 | 46                                      |
| EE | P(GMA <sub>39</sub> -b-(OEO <sub>5</sub> MA) <sub>35</sub> )                         | 16,640           | 1.25 | 65                                 | 35                                      |
| FF | P(GMA <sub>39</sub> -b-(OEO <sub>5</sub> MA) <sub>41</sub> )                         | 18,390           | 1.29 | 69                                 | 31                                      |
| GG | P(GMA <sub>39</sub> -b-(OEO <sub>5</sub> MA) <sub>50</sub> )                         | 21,290           | 1.27 | 73                                 | 27                                      |
| HH | P(GMA <sub>39</sub> -b-(OEO <sub>5</sub> MA) <sub>243</sub> )                        | 79,200           | 1.15 | 93                                 | 7                                       |
| II | P(GMA <sub>39</sub> -b-(OEO <sub>5</sub> MA) <sub>265</sub> )                        | 85,900           | 1.44 | 94                                 | 6                                       |
