# Supplementary material
Source: PubMed Central journal article supplement (PMC3156157)
Supplement: 1106379108_ST02.pdf [file 1106379108_ST02.pdf]

**Table S2.** Relevant information, structure,  $\Delta$  charge, and charges at complexation based on modeled values for the amines used in this study.

| Amine code | Amine                                                                               | GMA-Amine                                                                           | $\Delta$ charge | Charges at complexation |
|------------|-------------------------------------------------------------------------------------|-------------------------------------------------------------------------------------|-----------------|-------------------------|
| 32         | 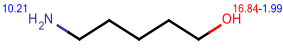   |    | 0               | 1                       |
| 60         |    |    | 1               | 2                       |
| 61         |    |    | 1               | 2                       |
| 66         |    |    | 0               | 2                       |
| 67         |    |    | 1               | 3                       |
| 68         |    |    | 0               | 2                       |
| 69         |   |   | 0               | 2                       |
| 73         |  |  | 0               | 1                       |
| 77         |  |  | 1               | 2                       |
| 80         |  |  | 1               | 2                       |
| 87         |  |  | 1               | 2                       |
| 94         |  |  | 1               | 2                       |
| 98         |  |  | 0               | 2                       |
| 99         |  |  | 0               | 2                       |
| 101        |  |  | 0               | 3                       |
| 102        |  |  | 1               | 2                       |

|       |                                                                                     |                                                                                     |   |   |
|-------|-------------------------------------------------------------------------------------|-------------------------------------------------------------------------------------|---|---|
| 103   | 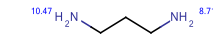   |    | 0 | 2 |
| 103-1 |    |    | 0 | 2 |
| 105   |    |    | 0 | 2 |
| 106   |    |    | 0 | 2 |
| 107   |    |    | 0 | 2 |
| 108   |    |    | 0 | 2 |
| 109   |    |    | 0 | 2 |
| 110   |    |    | 0 | 2 |
| 111   |    |    | 0 | 2 |
| 111-1 |   |   | 1 | 3 |
| 112   |  |  | 0 | 2 |
| 115   |  |  | 0 | 2 |
| 116   |  |  | 0 | 2 |
| 116-1 |  |  | 1 | 2 |
| 117   |  |  | 0 | 2 |
| 117-1 |  |  | 1 | 2 |
| 118   |  |  | 0 | 2 |
| 121   |  |  | 0 | 2 |

|     |  |  |   |   |
|-----|--|--|---|---|
| 122 |  |  | 0 | 2 |
| 124 |  |  | 0 | 1 |
| 125 |  |  | 0 | 2 |
| 126 |  |  | 1 | 4 |
| 127 |  |  | 1 | 3 |
| 128 |  |  | 1 | 3 |
| 200 |  |  | 1 | 3 |
| 201 |  |  |   |   |

|     |  |  |   |   |
|-----|--|--|---|---|
| 212 |  |  | 1 | 2 |
| 213 |  |  | 1 | 2 |
| 214 |  |  | 0 | 1 |
| 215 |  |  | 1 | 2 |
| 216 |  |  | 0 | 2 |
| 217 |  |  | 1 | 2 |
| 218 |  |  | 0 | 2 |
| 219 |  |  | 0 | 2 |
| 222 |  |  | 1 | 2 |
| 223 |  |  | 1 | 2 |
| 224 |  |  | 0 | 1 |
| 225 |  |  | 1 | 2 |
| 226 |  |  | 1 | 2 |
| 227 |  |  | 1 | 2 |
| 228 |  |  | 1 | 2 |
| 229 |  |  | 0 | 3 |
| 230 |  |  | 1 | 3 |
| 231 |  |  | 1 | 3 |



|     |                                                                                     |                                                                                      |   |   |
|-----|-------------------------------------------------------------------------------------|--------------------------------------------------------------------------------------|---|---|
| 259 | 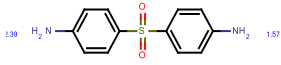   |     | 0 | 0 |
| 301 |    |    | 1 | 3 |
| 302 |    |    | 1 | 4 |
| 303 |    |     | 0 | 2 |
| 304 |    |     | 0 | 1 |
| 305 |    |     | 0 | 3 |
| 306 |    |    | 0 | 4 |
| 307 |    |    | 1 | 4 |
| 308 |    |     | 1 | 4 |
| 309 |   |   | 0 | 4 |
| 310 |  |   | 0 | 4 |
| 311 |  |   | 0 | 2 |
| 312 |  |   | 0 | 2 |
| 313 |  |   | 0 | 2 |
| 314 |  |   | 0 | 2 |
| 315 |  |  | 1 | 3 |
