# Supplementary material
Source: PubMed Central journal article supplement (PMC3156157)
Supplement: 1106379108_ST04.pdf [file 1106379108_ST04.pdf]

**Table S4.** (a) Results for the controlled homopolymerization of OEOMA300 by RAFT (molar ratios:  $[M]_0/[CTA]_0/[AIBN]_0$  (M:S, v:v) = 125:1:0.2 (1:1.6)). (b) MW results for the controlled chain extension of OEOMA300 from PGMA by RAFT (molar ratios:  $[OEOMA300]_0/[AIBN]_0/[PGMA\ macro-CTA]_0 = 100:0.2:1$ ). (c) MW results for the chain extension of GMA from POEO<sub>5</sub>MA by RAFT (molar ratios:  $[GMA]_0/[AIBN]_0/[POEO_5MA\ macro-CTA]_0 = 100:0.2:1$ ).

|          |                                                               | <b>t (hr)</b> | <b>M<sub>n</sub> (g/mol)</b> | <b>PDI</b> |
|----------|---------------------------------------------------------------|---------------|------------------------------|------------|
| <b>a</b> | P((OEO <sub>5</sub> MA) <sub>25</sub> )                       | 3             | 7950                         | 1.31       |
|          | P((OEO <sub>5</sub> MA) <sub>32</sub> )                       | 4             | 9860                         | 1.34       |
|          | P((OEO <sub>5</sub> MA) <sub>44</sub> )                       | 4.5           | 13700                        | 1.33       |
|          | P((OEO <sub>5</sub> MA) <sub>91</sub> )                       | 20            | 27400                        | 1.43       |
| <b>b</b> | P(GMA <sub>39</sub> -b-(OEO <sub>5</sub> MA) <sub>6</sub> )   | 1.0           | 8060                         | 1.30       |
|          | P(GMA <sub>39</sub> -b-(OEO <sub>5</sub> MA) <sub>22</sub> )  | 1.5           | 12760                        | 1.27       |
|          | P(GMA <sub>39</sub> -b-(OEO <sub>5</sub> MA) <sub>35</sub> )  | 2.0           | 16640                        | 1.26       |
|          | P(GMA <sub>39</sub> -b-(OEO <sub>5</sub> MA) <sub>41</sub> )  | 2.5           | 18390                        | 1.29       |
|          | P(GMA <sub>39</sub> -b-(OEO <sub>5</sub> MA) <sub>50</sub> )  | 3.5           | 21290                        | 1.30       |
| <b>c</b> | P((OEO <sub>5</sub> MA) <sub>25</sub> -b-GMA <sub>3</sub> )   | 0.25          | 8810                         | 1.38       |
|          | P((OEO <sub>5</sub> MA) <sub>25</sub> -b-GMA <sub>6</sub> )   | 0.5           | 9130                         | 1.36       |
|          | P((OEO <sub>5</sub> MA) <sub>25</sub> -b-GMA <sub>18</sub> )  | 0.63          | 10840                        | 1.33       |
|          | P((OEO <sub>5</sub> MA) <sub>25</sub> -b-GMA <sub>31</sub> )  | 0.66          | 12680                        | 1.70       |
|          | P((OEO <sub>5</sub> MA) <sub>32</sub> -b-GMA <sub>161</sub> ) | 2.5           | 33120                        | 1.67       |
|          | P((OEO <sub>5</sub> MA) <sub>44</sub> -b-GMA <sub>21</sub> )  | 0.66          | 17000                        | 1.36       |
|          | P((OEO <sub>5</sub> MA) <sub>44</sub> -b-GMA <sub>87</sub> )  | 1.0           | 26410                        | 1.41       |
|          | P((OEO <sub>5</sub> MA) <sub>91</sub> -b-GMA <sub>4</sub> )   | 1.0           | 28230                        | 1.43       |
|          | P((OEO <sub>5</sub> MA) <sub>91</sub> -b-GMA <sub>114</sub> ) | 4.0           | 43930                        | 1.98       |
